# Supplementary material for: Evaluation of Prognostic and Predictive Significance of Circulating MicroRNAs in Ovarian Cancer Patients
Source: Hindawi journal article supplement (doi:10.1155/2017/3098542), 2017-01-01
Supplement: f1 [file 3098542.f1.pdf]

## Supplementary Tables

**Supplementary Table 1**

**A:** RT Reaction mix components.

| Component Master mix volume 10 µl reaction  | 1x µl |
|---------------------------------------------|-------|
| 100mM dNTPs (with dTTP)                     | 0.10  |
| MultiScribe™Reverse Transcriptase, 50 U/7µL | 0.67  |
| 10x Reverse Transcription Buffer            | 1.00  |
| Rnase Inhibitor, 20 U/µL                    | 0.13  |
| Nuclease-free water                         | 2.80  |
| Total volume                                | 4.70  |
| 3µl RT primer (specific for each miRNA)(5X) | 2.00  |
| 3.3µl sample (30ng)                         | 3.30  |

**B:** Real Time PCR reaction mix components.

| Master mix volume 10µl                    | 1x    |
|-------------------------------------------|-------|
| TaqMan®Small RNA Assay (20x)              | 0.50  |
| Product from RT reaction                  | 0.70  |
| TaqMan®Universal PCR Master Mix(2x),noUNG | 5.00  |
| Nuclease-free water                       | 3.80  |
| Total volume                              | 10.00 |

**C.** Reverse Transcription Reaction (30ng totRNA input)

| Step type | Times (minutes) | Temp |
|-----------|-----------------|------|
| Hold      | 30              | 16°C |
| Hold      | 30              | 42°C |
| Hold      | 5               | 85°C |
| Hold      | ∞               | 4°C  |

**D.** Primer sequences for different miRNAs

| miRNA       | assay ID | sequence                |
|-------------|----------|-------------------------|
| miR-141     | 463      | UAACACUGUCUGGUAAAGAUGG  |
| miR-200c    | 2300     | UAAUACUGCCGGGUAAUGAUGGA |
| miR-200b    | 2251     | UAAUACUGCCUGGUAAUGAUGA  |
| miR-1274A   | 2883     | GUCCUGUUCAGGCGCCA       |
| miR-520d-3p | 2743     | AAAGUGCUUCUCUUUGGUGGGU  |
| miR-520c-3p | 2400     | AAAGUGCUUCCUUUUAGAGGGU  |
